# Supplementary material for: Mobility of bound water in PNIPAM microgels
Source: Royal Society of Chemistry journal article supplement (doi:10.1039/d1cp01823j), 2021-01-01
Supplement: d1cp01823j1.pdf [file d1cp01823j1.pdf]

## Supplementary Information:

### Mobility of bound water in PNIPAM microgels

Tetyana Kyrey<sup>\*a</sup>, Judith Witte<sup>b</sup>, Jana Lutzki<sup>b</sup>, Michaela Zamponi<sup>a</sup>, Stefan Wellert<sup>b</sup>, Olaf Holderer<sup>a</sup>

<sup>a</sup> Forschungszentrum Jülich GmbH, Jülich Centre for Neutron Science at Heinz Maier-Leibnitz Zentrum, Garching, Germany.

Fax: +49 89 158860-799; Tel: +49 89 158860-841; E-mail: t.kyrey@fz-juelich.de

<sup>b</sup> Technical University Berlin, Institute of Chemistry, Berlin, Germany

The QENS spectra for different temperatures and different  $q$ -values and some auxiliary plots are presented in this document. The different constituents of the fit function are presented in Figure 1. Figure 2 shows the fit parameters for the humidified microgel at 323 K. Figures 3-5 show the QENS spectra for the two samples at  $q$ -values. Figure 6 illustrates temperature dependence of amplitude and relaxation time of dried microgels, in case the amplitudes are fitted as well.

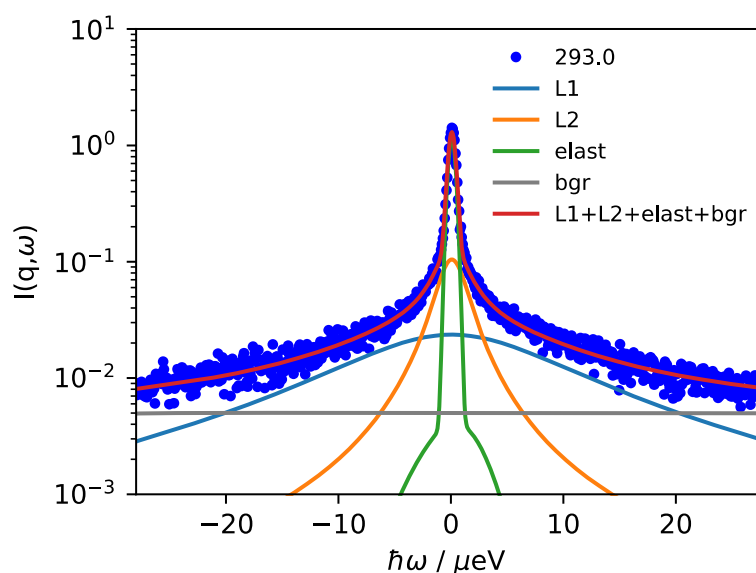

Figure 1: Components of the fit function for a representative QENS spectrum at 293K of the humidified microgel. The fit comprises two Lorentzians L1 and L2, an elastic contribution from the immobile protons and a background contribution.

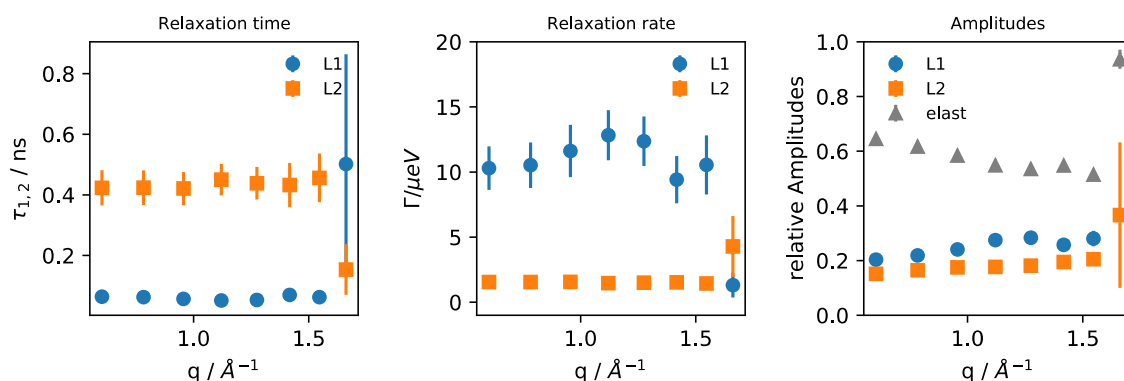

Figure 2: Fit parameters for the humidified microgel at 323K.

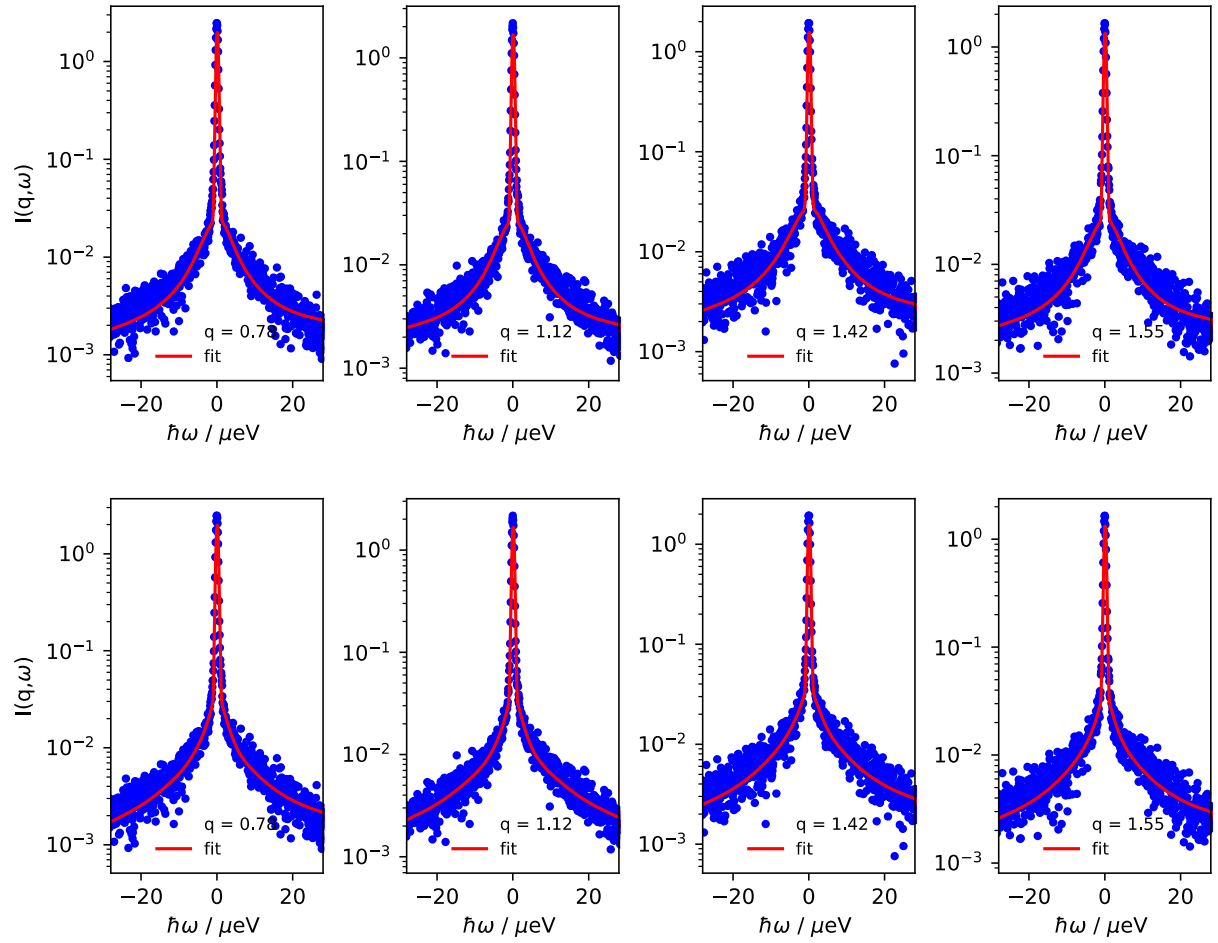

Figure 3: QENS spectra for the dry microgel at 293K at 4 different  $q$ -values with 1 Lorentzian contribution (top) and two Lorentzian contributions (bottom). The chisquare is almost identical; it was therefore decided to take only one single Lorentzian function for the dry PNIPAM sample.

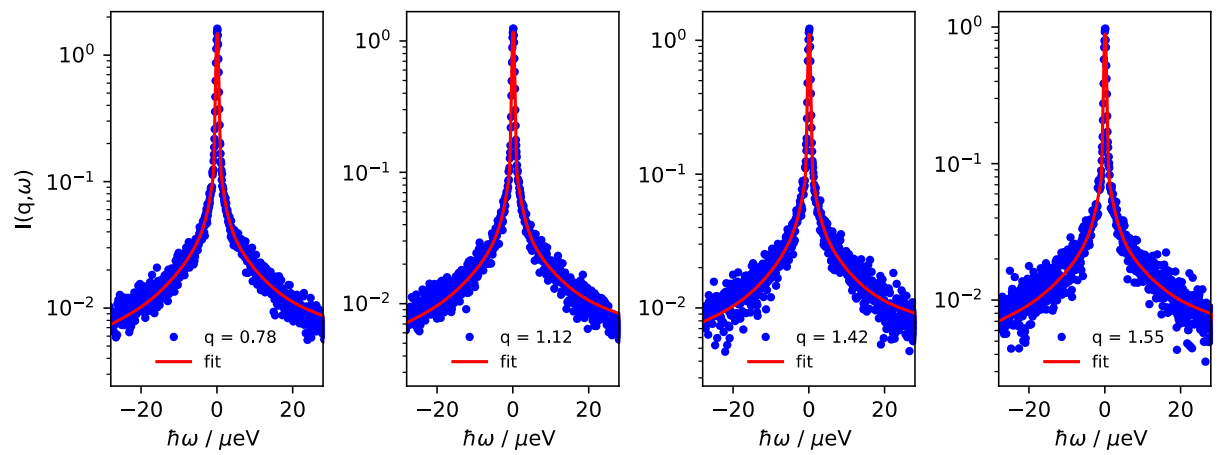

Figure 4: QENS spectra of the humidified microgel at 293K for different  $q$  values.

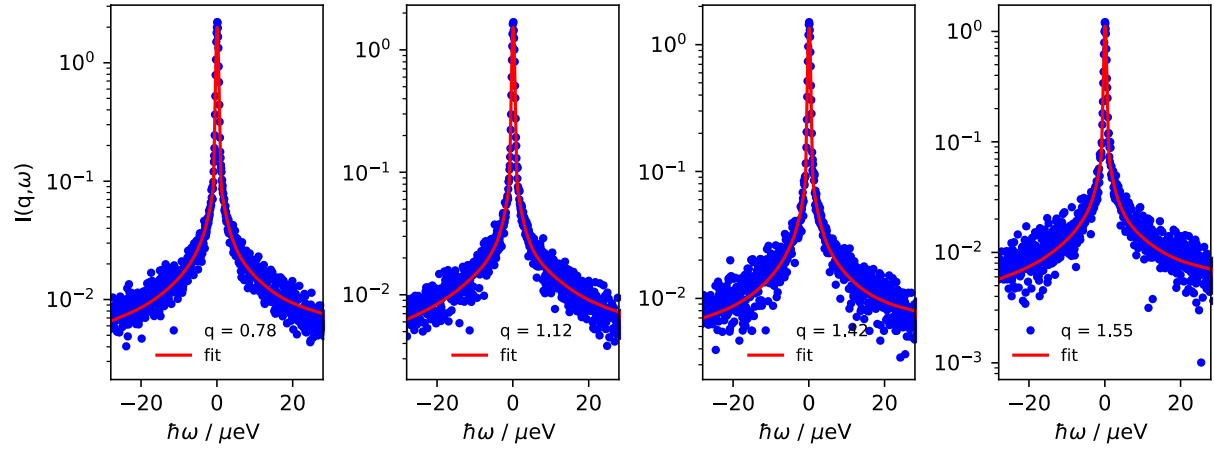

Figure 5: QENS spectra of the humidified microgel at 323 K at 4 different  $q$  values

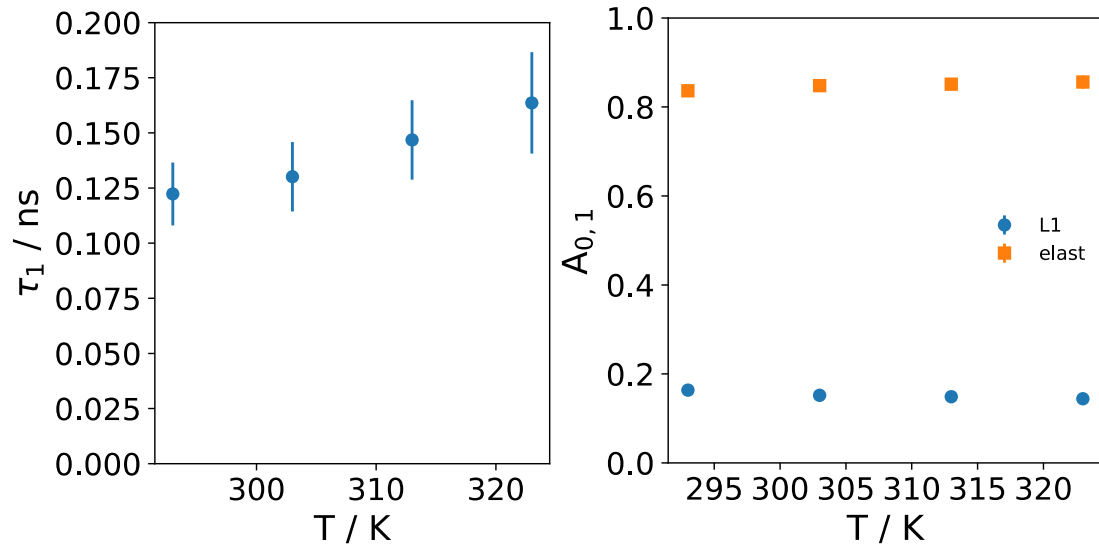

Figure 6: Temperature dependence of Amplitude and relaxation time of dried microgels, if the amplitudes are fitted as well. Then the relaxation time slightly increases, but still only very slightly.
